# Supplementary material for: Constructing dual active sites for synergistic electrocatalysis of hydrogen oxidation: single-metal-atoms anchored on WC2O2 MXene
Source: Royal Society of Chemistry journal article supplement (doi:10.1039/d2qm00440b), 2022-01-01
Supplement: d2qm00440b1.pdf [file d2qm00440b1.pdf]

**Constructing Dual Active Sites for Synergistic Electrocatalysis of Hydrogen  
Oxidation: Single-Metal-Atoms Anchored on WC<sub>2</sub>O<sub>2</sub> MXene**

Lianming Zhao,<sup>\*a</sup> Xiaonan Han,<sup>a</sup> Yanfu Tong,<sup>a</sup> Yanping Ding,<sup>a</sup> Weichao Kong,<sup>a</sup>  
Jiajun Wang,<sup>a</sup> Bingyu Li,<sup>a</sup> Jing Xu,<sup>\*a</sup> Peng Bai,<sup>b</sup> and Wei Xing<sup>a</sup>

<sup>a</sup>School of Materials Science and Engineering, China University of Petroleum (East  
China), Qingdao, Shandong 266580, P. R. China

<sup>b</sup>School of Chemical Engineering, China University of Petroleum (East China),  
Qingdao, Shandong 266580, P. R. China

\*Corresponding authors.

E-mail addresses: lmzhao@upc.edu.cn (L. Zhao), xujing@upc.edu.cn (J. Xu).

## Table of contents

|                                                                                                          |      |
|----------------------------------------------------------------------------------------------------------|------|
| 1. Structural parameters of $W_2C$ and $W_2CO_2$ .....                                                   | S-3  |
| 2. Mulliken charge $q$ for $W_2CO_2-M_{sa}$ .....                                                        | S-4  |
| 3. Adsorption energy for different species on $W_2CO_2-M_{sa}$ .....                                     | S-5  |
| 4. Adsorption energy of $H_2$ and $H_2O$ with hydroxyl groups.....                                       | S-6  |
| 5. Rate constants $k$ of the elementary reactions for HOR.....                                           | S-7  |
| 6. The configuration for $W_2CO_2-M_{sa}$ with the $K^+OH^-$ solution.....                               | S-8  |
| 7. Possible adsorption configurations of oxygen on $W_2C$ MXene.....                                     | S-9  |
| 8. Possible $W_2CO_2$ models fully terminated by $-O$ groups.....                                        | S-10 |
| 9. Optimized structures of $W_2CO_2-M_{sa}$ .....                                                        | S-11 |
| 10. The sliced DED map for $W_2CO_2-M_{sa}$ .....                                                        | S-12 |
| 11. Co-adsorption configurations of $H_2O^*+OH^*$ and $H_2^*+OH^*$ .....                                 | S-13 |
| 12. PDOS for the p-band of the <i>ortho</i> -O atoms for $W_2CO_2-M_{sa}$ .....                          | S-14 |
| 13. Phase diagram for water in contact with $W_2CO_2-M_{sa}$ .....                                       | S-15 |
| 14. Free energy diagrams for the HOR on $W_2CO_2-M_{sa}$ , $M_{sa} = Cr, Fe, Co, Ni, Cu,$ and $Zn$ ..... | S-16 |
| 15. Free energy diagrams for the HOR on $W_2CO_2-M_{sa}$ , $M_{sa} = Ru, Pd, Ir,$ and $Au$ ..            | S-17 |

**Table S1** Lattice constant  $a$  and bond length  $d$  (in Å) of  $W_2C$  and  $W_2CO_2$ .

| Species   | Parameters | This work | Other works    |
|-----------|------------|-----------|----------------|
| $W_2C$    | $a$        | 2.878     | 2.874 (ref. 1) |
|           |            |           | 2.87 (ref. 2)  |
|           |            |           | 2.857 (ref. 3) |
| $W_2CO_2$ | $d(W-C)$   | 2.121     | 2.121 (ref. 3) |
|           | $d(W-O)$   | 2.093     | 2.06 (ref. 2)  |
|           | $d(W-C)$   | 2.184     | 2.17 (ref. 2)  |

## References

- 1 H. Pan, Ultra-high electrochemical catalytic activity of MXenes, *Sci. Rep.*, 2016, **6**, 1–10.
- 2 S. A. Khan, G. Rehman, I. Ahmad, M. Maqbool, C. Franchini, B. Amin, Intriguing electronic and optical properties of  $M_2CX_2$  (M= Mo, W; X= O, F) MXenes and their van der Waals heterostructures, *Chem. Phys. Lett.*, 2019, **731**, 136614.
- 3 D. Wu, S. Wang, S. Zhang, J. Yuan, B. Yang, H. Chen, Highly negative Poisson's ratio in a flexible two-dimensional tungsten carbide monolayer, *Phys. Chem. Chem. Phys.*, 2018, **20**, 18924–18930.

**Table S2** Mulliken charge  $q$  (in e) for  $W_2CO_2-M_{sa}$ .

| Catalysts         | $q(M_{sa})$ | $q(ortho-O)$ | $q(ortho-W)$ |
|-------------------|-------------|--------------|--------------|
| $W_2CO_2-Cr_{sa}$ | 0.356       | -0.635       | 0.678        |
| $W_2CO_2-Mn_{sa}$ | 0.418       | -0.643       | 0.668        |
| $W_2CO_2-Fe_{sa}$ | 0.160       | -0.633       | 0.709        |
| $W_2CO_2-Co_{sa}$ | 0.059       | -0.633       | 0.749        |
| $W_2CO_2-Ni_{sa}$ | 0.177       | -0.634       | 0.705        |
| $W_2CO_2-Cu_{sa}$ | 0.216       | -0.638       | 0.706        |
| $W_2CO_2-Zn_{sa}$ | 0.414       | -0.641       | 0.650        |
| $W_2CO_2-Ru_{sa}$ | 0.109       | -0.626       | 0.719        |
| $W_2CO_2-Pd_{sa}$ | 0.072       | -0.631       | 0.743        |
| $W_2CO_2-Ir_{sa}$ | 0.048       | -0.622       | 0.723        |
| $W_2CO_2-Pt_{sa}$ | 0.009       | -0.625       | 0.742        |
| $W_2CO_2-Au_{sa}$ | 0.114       | -0.634       | 0.717        |
| $W_2CO_2$         | -           | -0.628       | 0.940        |

**Table S3** Adsorption energy  $E_{\text{ads}}$  (in eV) for different species at the most stable site of  $\text{W}_2\text{CO}_2\text{-M}_{\text{sa}}$ .

| Catalysts                                     | H*    | H <sub>2</sub> * | H <sub>2</sub> O* | OH*   |
|-----------------------------------------------|-------|------------------|-------------------|-------|
| $\text{W}_2\text{CO}_2\text{-Cr}_{\text{sa}}$ | -0.16 | -0.44            | -1.71             | -4.32 |
| $\text{W}_2\text{CO}_2\text{-Mn}_{\text{sa}}$ | -0.21 | -0.51            | -1.72             | -4.20 |
| $\text{W}_2\text{CO}_2\text{-Fe}_{\text{sa}}$ | -0.22 | -0.59            | -1.66             | -3.80 |
| $\text{W}_2\text{CO}_2\text{-Co}_{\text{sa}}$ | -0.22 | -0.61            | -1.63             | -3.47 |
| $\text{W}_2\text{CO}_2\text{-Ni}_{\text{sa}}$ | -0.19 | -0.59            | -1.59             | -3.21 |
| $\text{W}_2\text{CO}_2\text{-Cu}_{\text{sa}}$ | -0.11 | -0.51            | -1.55             | -2.95 |
| $\text{W}_2\text{CO}_2\text{-Zn}_{\text{sa}}$ | -0.07 | -0.32            | -1.60             | -3.53 |
| $\text{W}_2\text{CO}_2\text{-Ru}_{\text{sa}}$ | -0.26 | -0.45            | -1.32             | -3.22 |
| $\text{W}_2\text{CO}_2\text{-Pd}_{\text{sa}}$ | -0.20 | -0.44            | -1.19             | -2.19 |
| $\text{W}_2\text{CO}_2\text{-Ir}_{\text{sa}}$ | -0.26 | -0.54            | -1.32             | -3.21 |
| $\text{W}_2\text{CO}_2\text{-Pt}_{\text{sa}}$ | -0.21 | -0.48            | -1.23             | -2.64 |
| $\text{W}_2\text{CO}_2\text{-Au}_{\text{sa}}$ | -0.08 | -0.32            | -1.17             | -2.46 |

**Table S4** Adsorption energy  $E_{\text{ads}}$  (in eV) of  $\text{H}_2$  and  $\text{H}_2\text{O}$  with a hydroxyl group on  $\text{W}_2\text{CO}_2\text{-M}_{\text{sa}}$ .

| Catalysts                                     | $\text{H}_2^*$ | $\text{H}_2\text{O}^*$ |
|-----------------------------------------------|----------------|------------------------|
| $\text{W}_2\text{CO}_2\text{-Cr}_{\text{sa}}$ | -0.13          | -1.59                  |
| $\text{W}_2\text{CO}_2\text{-Mn}_{\text{sa}}$ | -0.18          | -1.35                  |
| $\text{W}_2\text{CO}_2\text{-Fe}_{\text{sa}}$ | -0.29          | -1.29                  |
| $\text{W}_2\text{CO}_2\text{-Co}_{\text{sa}}$ | -0.37          | -1.23                  |
| $\text{W}_2\text{CO}_2\text{-Ni}_{\text{sa}}$ | -0.38          | -1.19                  |
| $\text{W}_2\text{CO}_2\text{-Cu}_{\text{sa}}$ | -0.34          | -1.12                  |
| $\text{W}_2\text{CO}_2\text{-Zn}_{\text{sa}}$ | -0.22          | -1.21                  |
| $\text{W}_2\text{CO}_2\text{-Ru}_{\text{sa}}$ | -0.33          | -1.24                  |
| $\text{W}_2\text{CO}_2\text{-Pd}_{\text{sa}}$ | -0.35          | -1.02                  |
| $\text{W}_2\text{CO}_2\text{-Ir}_{\text{sa}}$ | -0.32          | -1.08                  |
| $\text{W}_2\text{CO}_2\text{-Pt}_{\text{sa}}$ | -0.33          | -1.04                  |
| $\text{W}_2\text{CO}_2\text{-Au}_{\text{sa}}$ | -0.23          | -0.94                  |

**Table S5** Rate constants  $k$  (in  $\text{s}^{-1} \text{site}^{-1}$ ) of the elementary reactions for HOR on  $\text{W}_2\text{CO}_2\text{-M}_{\text{sa}}$ .

| Catalysts                                     | Heyrovsky | H*+OH*   |
|-----------------------------------------------|-----------|----------|
| $\text{W}_2\text{CO}_2\text{-Cr}_{\text{sa}}$ | 7.44E+04  | 2.95E+07 |
| $\text{W}_2\text{CO}_2\text{-Mn}_{\text{sa}}$ | 1.45E+12  | 6.50E+09 |
| $\text{W}_2\text{CO}_2\text{-Fe}_{\text{sa}}$ | 6.03E+09  | 6.39E+10 |
| $\text{W}_2\text{CO}_2\text{-Co}_{\text{sa}}$ | 5.43E+09  | 4.50E+10 |
| $\text{W}_2\text{CO}_2\text{-Ni}_{\text{sa}}$ | 3.55E+09  | 1.60E+11 |
| $\text{W}_2\text{CO}_2\text{-Cu}_{\text{sa}}$ | 6.44E+08  | 1.05E+10 |
| $\text{W}_2\text{CO}_2\text{-Zn}_{\text{sa}}$ | 2.19E+10  | 6.94E+11 |
| $\text{W}_2\text{CO}_2\text{-Ru}_{\text{sa}}$ | 6.16E+06  | 5.55E+11 |
| $\text{W}_2\text{CO}_2\text{-Pd}_{\text{sa}}$ | 2.52E+06  | 1.42E+10 |
| $\text{W}_2\text{CO}_2\text{-Ir}_{\text{sa}}$ | 8.14E+09  | 6.62E+11 |
| $\text{W}_2\text{CO}_2\text{-Pt}_{\text{sa}}$ | 1.02E+12  | 1.11E+12 |
| $\text{W}_2\text{CO}_2\text{-Au}_{\text{sa}}$ | 3.58E+07  | 7.96E+10 |

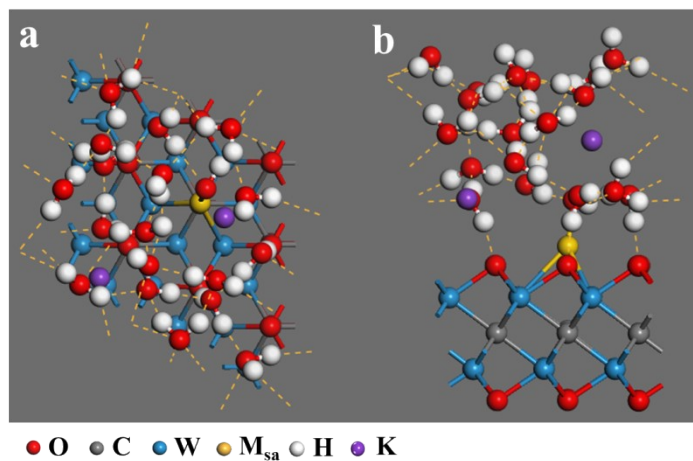

**Fig. S1.** (a) Side and (b) top views of the configuration for the  $W_2CO_2-M_{sa}$  catalysts with the  $K^+OH^-$  solution. The yellow dashed lines indicate the hydrogen bonding.



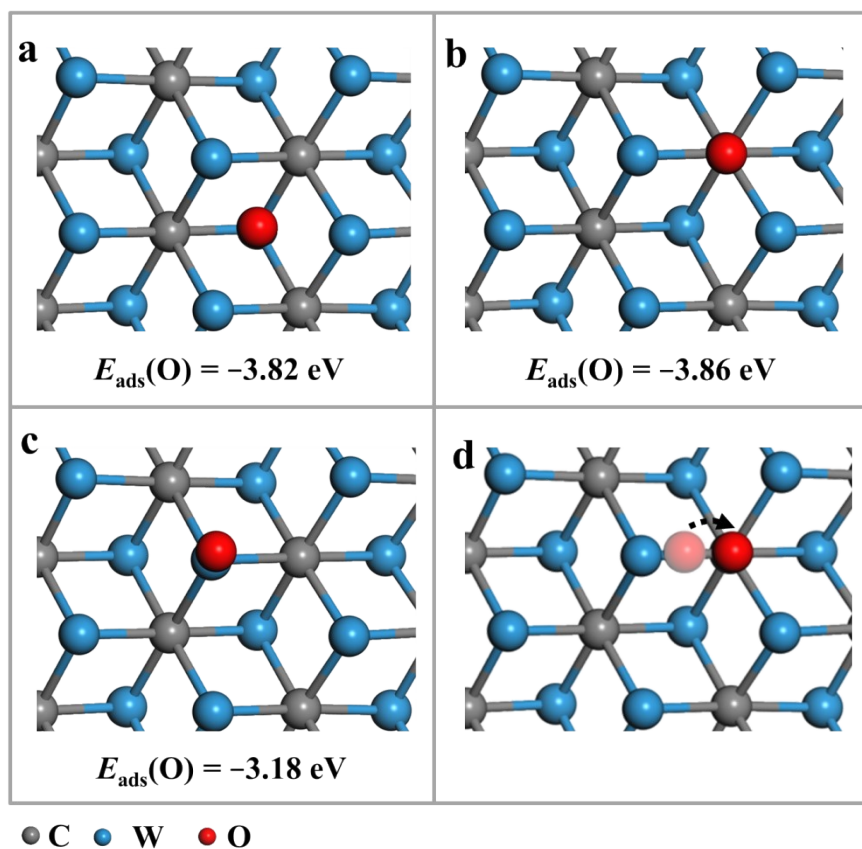

**Fig. S2.** Adsorption configurations of oxygen at the (a) fcc, (b) hcp, (c) top, and (d) bridge sites of  $\text{W}_2\text{C}$  MXene. Note that the O atom initially located at the bridge site will be transferred to the hcp site after optimization. Bottom values are the O adsorption energy on  $\text{W}_2\text{C}$  MXene.

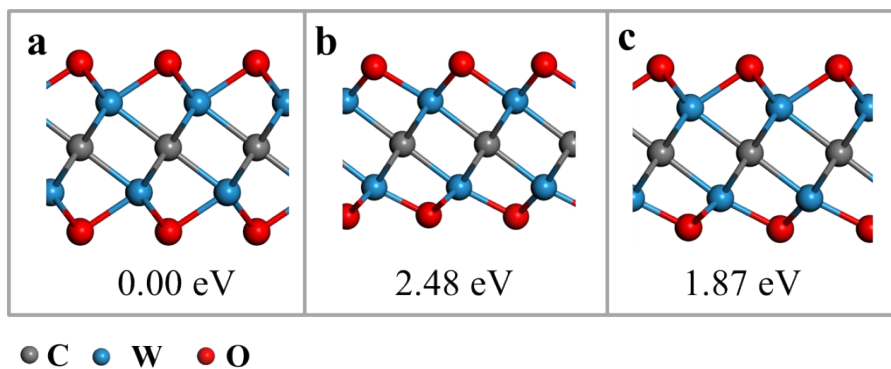

**Fig. S3.**  $W_2CO_2$  models fully terminated by  $-O$  groups, that is, the  $-O$  groups on the top and bottom surfaces are located at (a) the hcp sites, (b) the fcc sites, and (c) the fcc and hcp sites, respectively. Bottom values indicate the energy differences relative to the most stable structure.

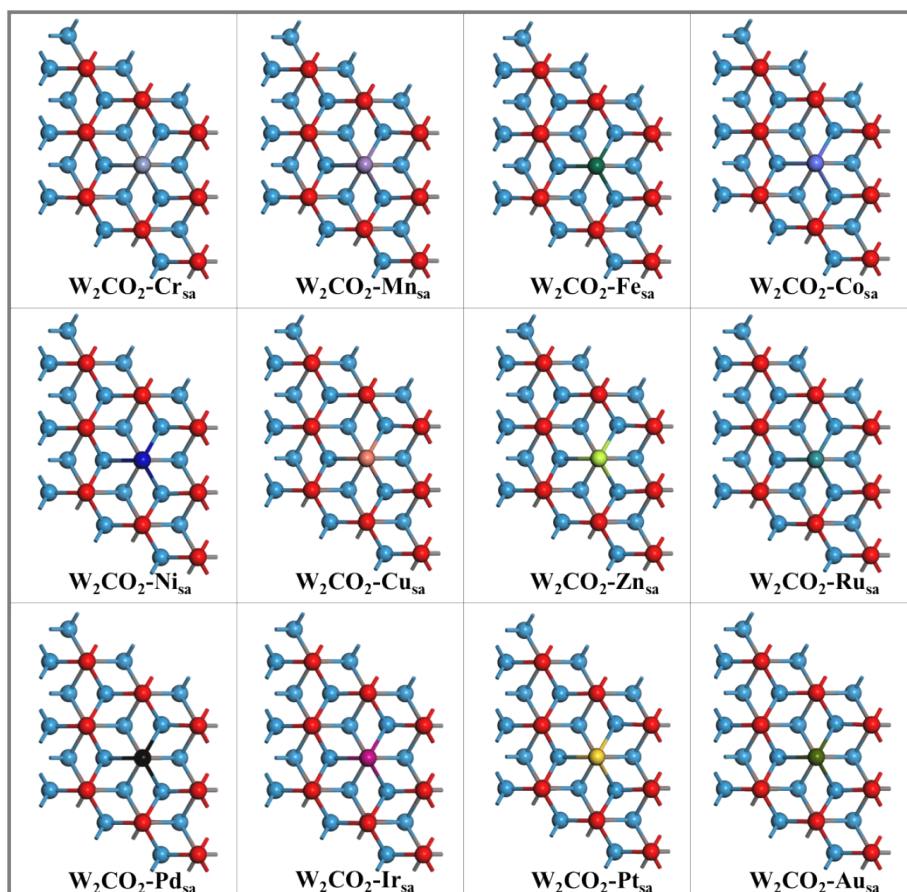

**Fig. S4.** Optimized structures of  $W_2CO_2-M_{sa}$ . The light blue, grey, and red balls denote W, C, and O, respectively, while the balls with other colors represent the corresponding  $M_{sa}$  atoms.

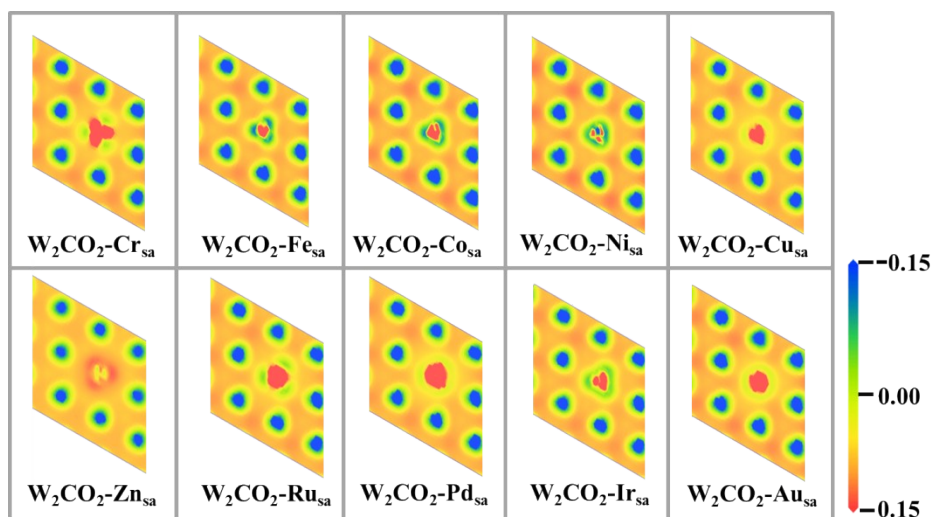

**Fig. S5.** The sliced deformation electron density (DED) map for  $W_2CO_2-M_{sa}$ ,  $M_{sa} =$  Cr, Fe, Co, Ni, Cu, Zn, Ru, Pd, Ir, and Au.

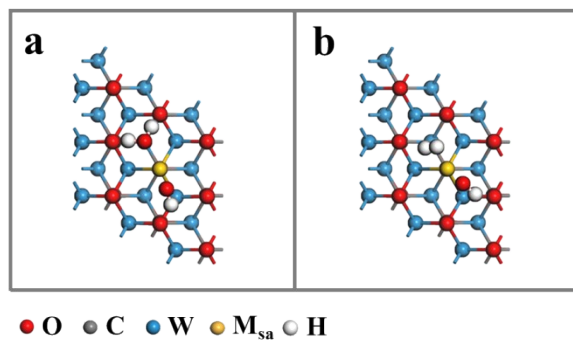

**Fig. S6.** Co-adsorption configurations of (a)  $\text{H}_2\text{O}^* + \text{OH}^*$  and (b)  $\text{H}_2^* + \text{OH}^*$  on  $\text{W}_2\text{CO}_2\text{-M}_{\text{sa}}$ .

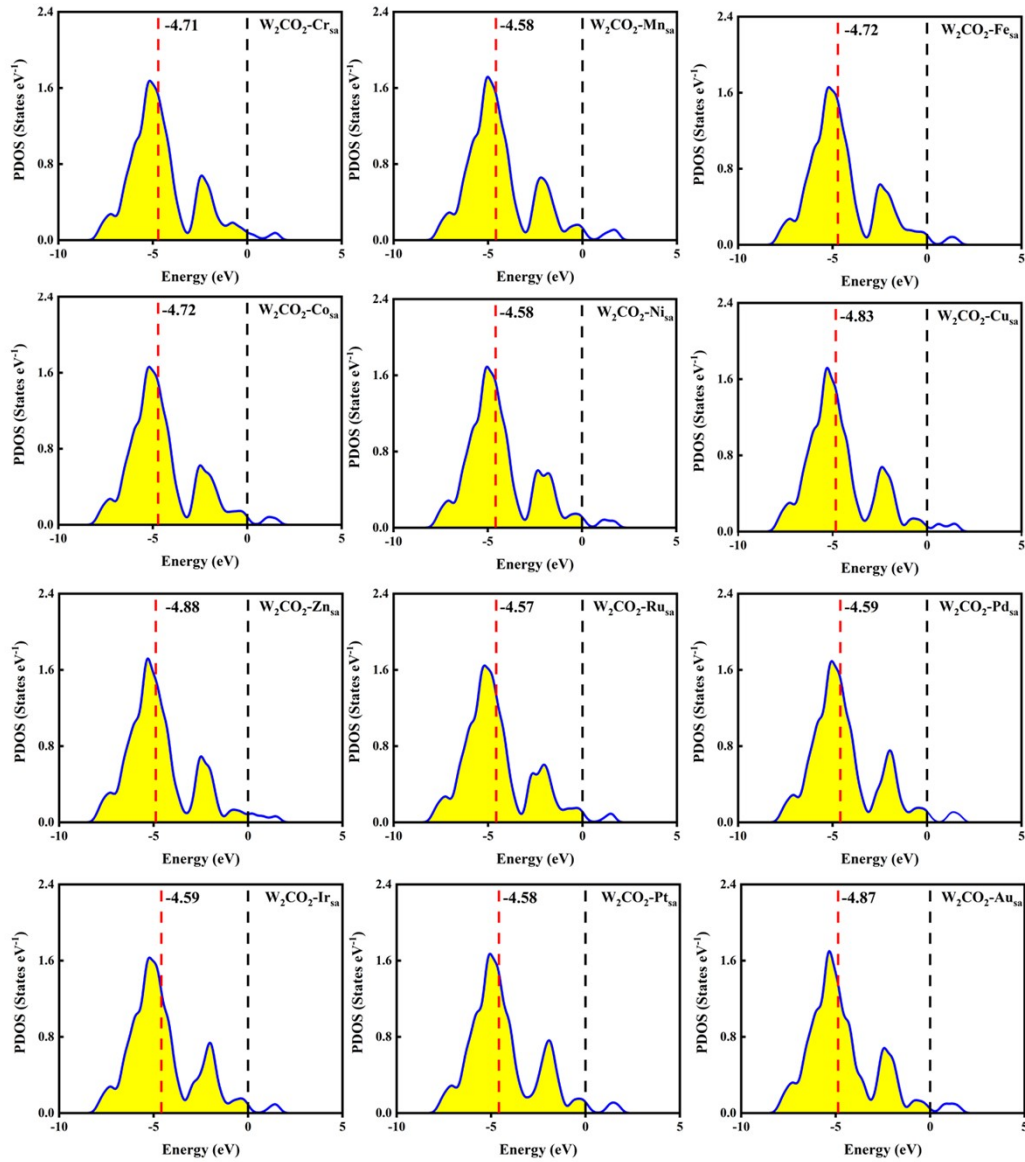

**Fig. S7.** PDOS for the p-band of the *ortho*-O atoms for  $W_2CO_2-M_{sa}$ . The Fermi level marked by dashed black lines is set as the energy zero. The p-band centers (in eV) are shown by dashed red lines. The shadows indicate the integrate interval from the minimum energy to the Fermi level.

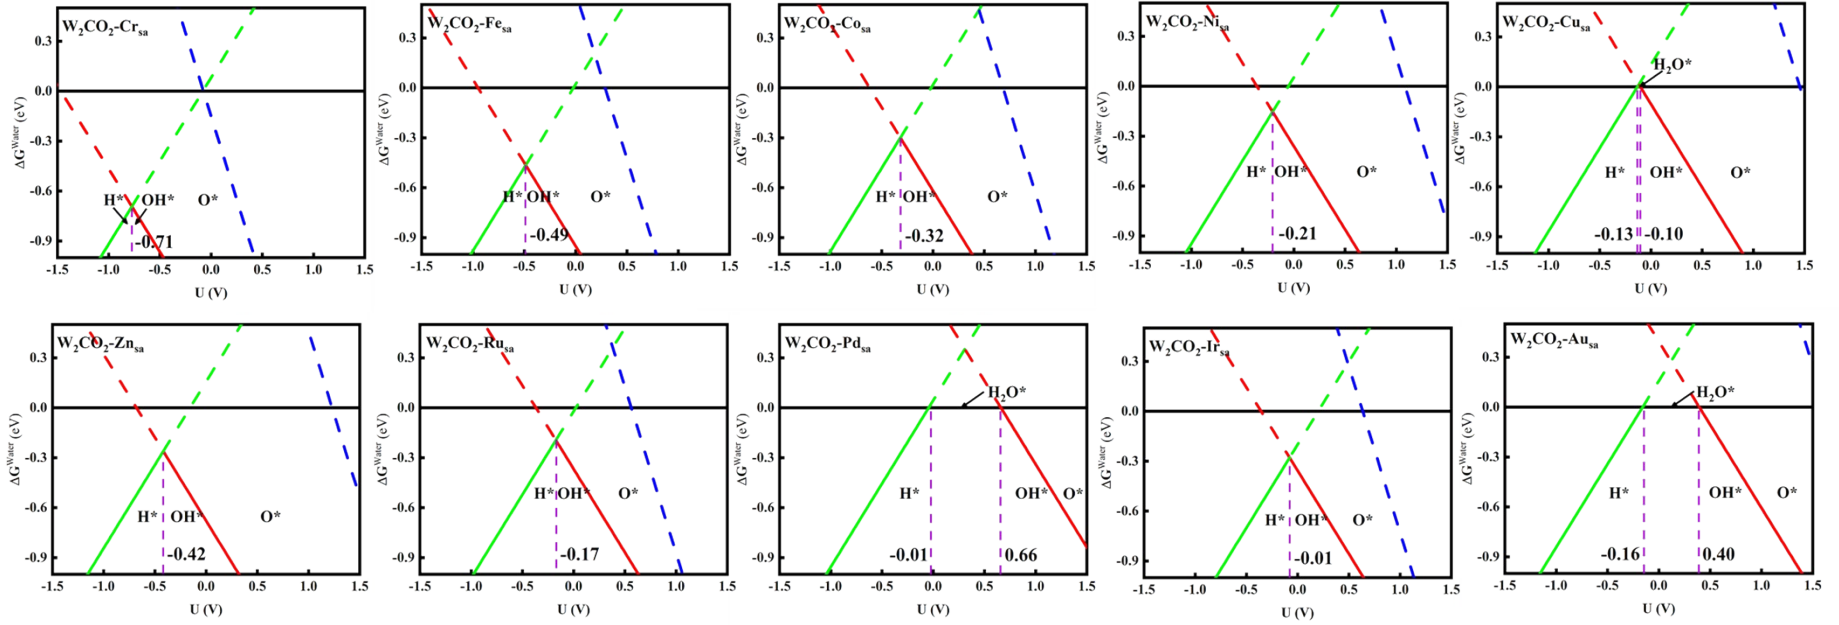

**Fig. S8.** Phase diagram showing the free energy for different surface structures for water in contact with  $W_2CO_2-M_{sa}$ ,  $M_{sa} = Cr, Fe, Co, Ni, Cu,$

$Zn, Ru, Pd, Ir,$  and  $Au$ . The free energy for liquid water at 298 K is defined as  $\Delta G^{water}(U) = 0$  (black line).  $\Delta G_{H^*}^{water}(U) = \Delta G_{H^*}^{water}(0) + eU$

(green line),  $\Delta G_{OH^*}^{water}(U) = \Delta G_{OH^*}^{water}(0) - eU$  (red line), and  $\Delta G_{O^*}^{water}(U) = \Delta G_{O^*}^{water}(0) - 2eU$  (blue line).

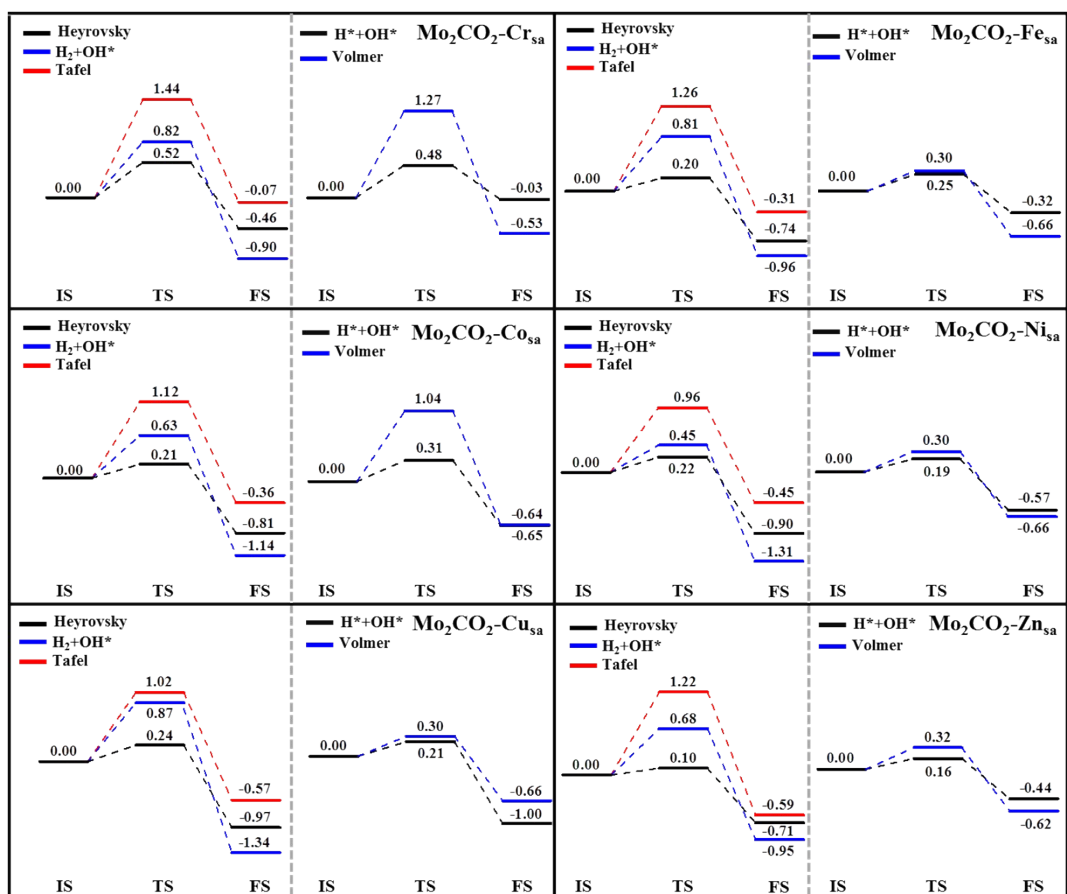

**Fig. S9.** Free energy diagrams (in eV) of the elementary reactions for the HOR on  $\text{W}_2\text{CO}_2\text{-M}_{\text{sa}}$ ,  $\text{M}_{\text{sa}} = \text{Cr, Fe, Co, Ni, Cu, and Zn}$ . IS, TS, and FS are the initial state, transition state, and final state in the reactions, respectively.



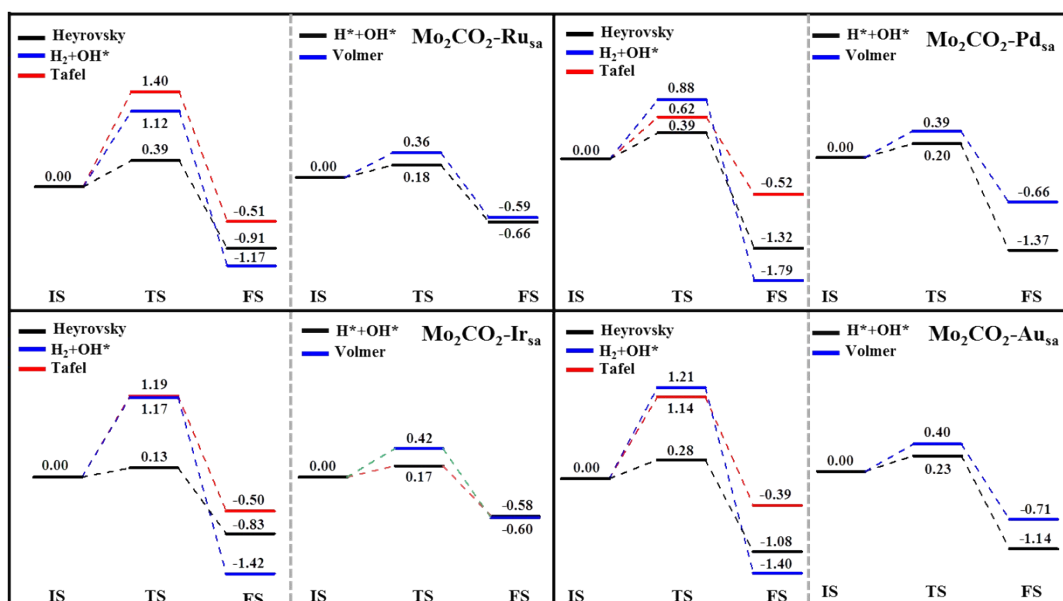

**Fig. S10.** Free energy diagrams (in eV) of the elementary reactions for the HOR on  $W_2CO_2-M_{sa}$ ,  $M_{sa} = Ru, Pd, Ir,$  and  $Au$ . IS, TS, and FS are the initial state, transition state, and final state in the reactions, respectively.
